## Prognostic factors in men with metastatic castration-resistant prostate cancer treated with cabazitaxel

Bodine P.S. Belderbos<sup>1</sup>, Ronald de Wit<sup>1</sup>, Esther Oomen-de Hoop<sup>1</sup>, Annemieke Nieuweboer<sup>1</sup>, Paul Hamberg<sup>2</sup>, Robbert J. van Alphen<sup>3</sup>, André Bergman<sup>4</sup>, Nelly van der Meer<sup>1</sup>, Sander Bins<sup>1</sup>, Ron H.J. Mathijssen<sup>1</sup> and Robert J. van Soest<sup>5</sup>

<sup>1</sup>Department of Medical Oncology, Erasmus University Medical Center and Cancer Institute, 3015 CE Rotterdam, The Netherlands

<sup>2</sup>Department of Internal Medicine, Franciscus Gasthuis and Vlietland, 3045 PM Rotterdam, The Netherlands

<sup>3</sup>Department of Internal Medicine, Elisabeth Tweesteden Ziekenhuis, 5042 AD Tilburg, The Netherlands

<sup>4</sup>Department of Medical Oncology, Netherlands Cancer Institute–Antoni van Leeuwenhoek, 1066 CX Amsterdam, The Netherlands

<sup>5</sup>Department of Urology, Erasmus University Medical Center and Cancer Institute, 3015 CE Rotterdam, The Netherlands

**Correspondence to:** Bodine P.S. Belderbos, *email:* b.belderbos@erasmusmc.nl

**Keywords:** prognostic factors; cabazitaxel; mCRPC; overall survival; PSA response

**Received:** August 08, 2017

**Accepted:** October 27, 2017

**Published:** November 16, 2017

**Copyright:** Belderbos et al. This is an open-access article distributed under the terms of the Creative Commons Attribution License 3.0 (CC BY 3.0), which permits unrestricted use, distribution, and reproduction in any medium, provided the original author and source are credited.

### ABSTRACT

**Background:** Treatment selection for men with metastatic castration-resistant prostate cancer (mCRPC) has become increasingly challenging with the introduction of novel therapies at earlier disease stages. The purpose of this study was to identify prognostic factors for overall survival (OS) and PSA response in patients with mCRPC treated with cabazitaxel.

**Results:** 224 mCRPC patients were included in the current analysis. In multivariable analysis, WHO performance status, baseline hemoglobin, alkaline phosphatase and albumin were all significantly associated with OS. Hemoglobin and alkaline phosphatase were significantly associated with PSA response.

**Conclusions:** This study identified prognostic factors for OS and PSA response of men with mCRPC treated with cabazitaxel. In an increasingly complicated treatment landscape with several treatment options available our findings might serve to estimate the chance of survival of men qualifying for treatment with second-line chemotherapy in daily practice. Furthermore, these data can be used to risk-stratify patients in clinical trials.

**Methods:** We performed a post-hoc analysis of a randomized phase II trial of mCRPC patients treated with cabazitaxel. Cox and logistic regression models were used to investigate the influence of clinical and biochemical variables on OS and PSA response. Nomograms were developed to estimate the chance of PSA response and OS.

### INTRODUCTION

With the introduction of novel agents, treatment options for metastatic castration-resistant prostate cancer (mCRPC) have notably evolved in the past few years. Since level one evidence supporting an optimal treatment sequence in mCRPC is lacking, the choice of treatment by the clinician has become increasingly challenging.

Treatment decisions are generally made on the basis of clinical symptoms, comorbidities, expected side-effects and preferences by the patient and the treating physician. Risk classification and prognosis assessment remain critical before the start of a new therapy. Therefore, it is important to identify biomarkers, predictive and prognostic factors for clinical outcome, in order to simplify treatment choice and timing. Such factors may

serve to predict individual prognosis at the start of therapy and to classify patients in different risk-groups, which can also be used for stratification in clinical trials.

Prognostic models and nomograms for mCRPC patients receiving first-line chemotherapy have been developed based on large phase III trials [1–3], including parameters such as performance status, time since last docetaxel use, the presence of measurable disease, the presence of visceral disease, the presence of pain, duration of hormonal treatment, hemoglobin (Hb), prostate specific antigen (PSA) and alkaline phosphatase (AP). For second-line chemotherapy with cabazitaxel, prognostic factors were identified based on the TROPIC trial [4, 5]. However, these findings have not been investigated in other datasets of men treated with cabazitaxel. In the current study, we aimed to identify prognostic factors for men with mCRPC receiving cabazitaxel. For this purpose, we used data from a multicenter randomized phase II trial [6].

## RESULTS

### Patient characteristics

Baseline characteristics were available for 224 patients and are shown in Table 1. The characteristics were similar to other studies of men treated with second-line chemotherapy [5].

### OS

Median OS of patients in this dataset was 13.3 months (IQR 7.0–22.3). Results of the univariable and multivariable analyses for OS are shown in Table 2. Time since last chemotherapy, neutropenia grade 3/4, PSA and LDH were significantly associated with OS in univariable analysis, but not in multivariable analysis. In multivariable analysis, four parameters remained significantly associated with OS; WHO performance status (HR 1.49, 95% CI 1.04–2.13,  $p = 0.028$ ), Hb (HR 0.73, 95% CI 0.61–0.87,  $p = 0.001$ ), AP (HR 1.50, 95% CI 1.18–1.91,  $p = 0.001$ ) and Alb (HR 0.92, 95% CI 0.89–0.95,  $p < 0.001$ ). Of note, dNLR ( $p = 0.45$ ) was not associated with OS in univariable analysis.

Figure 1 presents a nomogram that is based on the multivariable model for OS. This nomogram can be used to predict the individual survival probability at 12 and 24 months. For example, a patient with a performance score of 1, an Hb level of 7.0 mmol/L, albumin level of 40 g/L and AP of 90 U/L ( $\log\_AP = 4.5$ ) has a 12 month survival probability of approximately 60% and a 24 month survival probability of approximately 20%.

### PSA response

Univariable analysis showed significant associations between PSA response and WHO performance status,

Hb, AP and LDH. In the multivariable model Hb and AP remained significantly associated with PSA response and were taken into the final model (Table 3). Higher hemoglobin level before treatment (OR 1.48, 95% CI 1.05–2.07,  $p = 0.024$ ), and a lower AP level at the start of treatment (OR 0.61, 95% CI 0.39–0.96,  $p = 0.034$ ) resulted in a higher chance of PSA response. Figure 2 displays a nomogram to calculate the chance of PSA response for an individual patient treated with cabazitaxel based on our multivariable model.

## DISCUSSION

In this post-hoc analysis of a large phase II trial of patients with mCRPC treated with cabazitaxel, we found that WHO performance status, baseline Hb, AP and albumin were all significantly associated with OS. In addition, Hb and AP were identified as parameters to predict the probability of PSA response in mCRPC patients receiving second-line chemotherapy. To our knowledge, we are the first to report prognostic factors and a nomogram for OS and PSA response in men with mCRPC treated with cabazitaxel outside of the TROPIC registration trial [5]. Treatment selection of men with metastatic prostate cancer has become increasingly challenging with the introduction of novel therapies at earlier disease stages. In this changing treatment paradigm, predictors and prognostic factors of treatment response and outcome are still lacking. The current study shows that readily available, cheap and easy to use clinical parameters are of prognostic value for estimating the chance of PSA response and OS using the presented nomograms (Figures 1 and 2). These individual probabilities of survival and response might help the physician to decide when to initiate treatment in daily clinical practice. As an illustration, if the identified prognostic factors follow a trend towards an unfavourable condition, it may help the physician to avoid missing the window of opportunity for cabazitaxel treatment and initiate therapy before the patients' condition is declining.

Several distinct predictors of OS and PSA response (e.g. albumin) were identified as compared to the models constructed from the TROPIC dataset [5, 7]. The difference between the identified variables in the final model from Halabi et al. and our cohort may be due to a different population, different primary trial design and different model assumptions. The strength of our model is that it is based only on men treated with cabazitaxel. In contrast, the Halabi nomogram has been constructed based on the TROPIC trial and validated on the SPARC trial, including also men treated with mitoxantrone and satraplatin which are not used in the current treatment armamentarium [5]. Therefore, our study might represent a more contemporary real-world patient population. This study is limited by its post-hoc design. As a result, radiographic variables such as the presence of visceral disease were not collected in the primary trial.

**Table 1: Patients characteristics**

| Characteristic                 | Value No. (%)       |
|--------------------------------|---------------------|
| All                            | 224 (100)           |
| Age, mean $\pm$ SD             | 68.8 $\pm$ 7.2      |
| WHO                            |                     |
| 0                              | 92 (41)             |
| 1                              | 130 (58)            |
| Missing                        | 2 (1)               |
| Type castration                |                     |
| Surgical                       | 30 (13)             |
| LHRH-analogue                  | 194 (87)            |
| No. prior therapies            |                     |
| 1                              | 204 (91)            |
| $\geq 2$                       | 20 (9)              |
| Months since last chemotherapy |                     |
| $\leq 6$ months                | 102 (46)            |
| $> 6$ months                   | 122 (54)            |
| Baseline laboratory results    | Median (IQR)        |
| Hb (mmol/L)                    | 7.7 (6.8–8.2)       |
| Albumin (g/L)                  | 39.0 (36.0–43.0)    |
| AP (U/L)                       | 130.0 (86.0–262.0)  |
| LDH (U/L)                      | 271.0 (210.0–392.0) |
| ANC ( $10^9/L$ )               | 5.9 (4.4–7.6)       |
| PSA (g/L)                      | 154.1 (59–388.3)    |
| dNLR                           | 2.7 (1.8–3.9)       |

Abbreviations: WHO = world health organization, Hb = hemoglobin, AP = Alkaline Phosphatase, LDH = lactate dehydrogenase, ANC = absolute neutrophil count, PSA = prostate specific antigen, dNLR = derived Neutrophil-Lymphocyte ratio.

**Table 2: Univariable and multivariable model for OS**

| Variable                              | Univariable HR (95% CI) | P-value   | Multivariable HR (95% CI) | P-value        |
|---------------------------------------|-------------------------|-----------|---------------------------|----------------|
| WHO PS                                | 1.57 (1.16–2.13)        | 0.004     | 1.49 (1.04–2.13)          | 0.028 (1 vs 0) |
| Time since last therapy ( $> 6$ mths) | 0.59 (0.44–0.79)        | $< 0.001$ |                           |                |
| Neutropenia (Gr.3/4)                  | 0.67 (0.50–0.90)        | 0.007     |                           |                |
| Hb (mmol/L)                           | 0.57 (0.49–0.67)        | $< 0.001$ | 0.73 (0.61–0.87)          | 0.001          |
| PSA (log, g/L)                        | 1.12 (1.01–1.26)        | 0.040     |                           |                |
| AP (log, U/L)                         | 1.83 (1.49–2.25)        | $< 0.001$ | 1.50 (1.18–1.19)          | 0.001          |
| LDH (log, U/L)                        | 2.37 (1.73–3.25)        | $< 0.001$ |                           |                |
| Albumin (g/L)                         | 0.91 (0.89–0.94)        | $< 0.001$ | 0.92 (0.89–0.95)          | $< 0.001$      |

Univariable  $N = 206$ – $224$  (because of missing values the number of included patients can differ per variable) Multivariable  $N = 200$ .

Abbreviations: WHO PS = world health organization performance status, Hb = hemoglobin, PSA = prostate specific antigen, AP = alkaline phosphatase, LDH = lactate dehydrogenase, log = log transformed variables when data were not normally distributed.

dNLR, a parameter to determine the inflammatory response rate of the host, has been reported and validated as a prognostic factor for OS and response in mCRPC patients treated with docetaxel, cabazitaxel and abiraterone [7–10]. In addition, a high dNLR was associated with poor OS in other tumor types [11]. However, in our analyses no significant association between dNLR and OS, nor between dNLR and PSA response was found. Furthermore, in a post-hoc analysis of the TROPIC trial neutropenia during treatment with cabazitaxel has shown a significant relation with OS of men with mCRPC [12]. Although we had comparable treatment groups, no association between the occurrence of grade 3–4 neutropenia and OS or PSA response was found.

In conclusion, this study identified clinical and biochemical variables associated with OS and PSA response of patients with mCRPC treated with cabazitaxel. In an increasingly complicated treatment landscape with several treatment options available including chemotherapy and novel AR-targeted agents, our findings have prognostic value for treatment response and survival of men qualifying for treatment with second-line

chemotherapy in daily practice. Furthermore, these data can be used to risk-stratify patients in future clinical trials.

## PATIENTS AND METHODS

### Patients

We performed a post-hoc analysis of a randomized phase II trial (CABARESC, NTR2991). The CABARESC trial was designed to investigate the influence of budesonide (9 mg daily) on cabazitaxel pharmacokinetics and cabazitaxel-induced diarrhea and was reported elsewhere [6]. Between December 2011 and October 2015, a total of 246 mCRPC patients were included in the study. The study was conducted in 22 Dutch hospitals and was approved by the ethics committee of the Erasmus MC (MEC 11-324) and all local institutional review boards. Written informed consent was obtained from all participants.

Full study details are described in the original paper [6]. Briefly, patients were eligible if they had metastatic castration-resistant adenocarcinoma of the prostate with

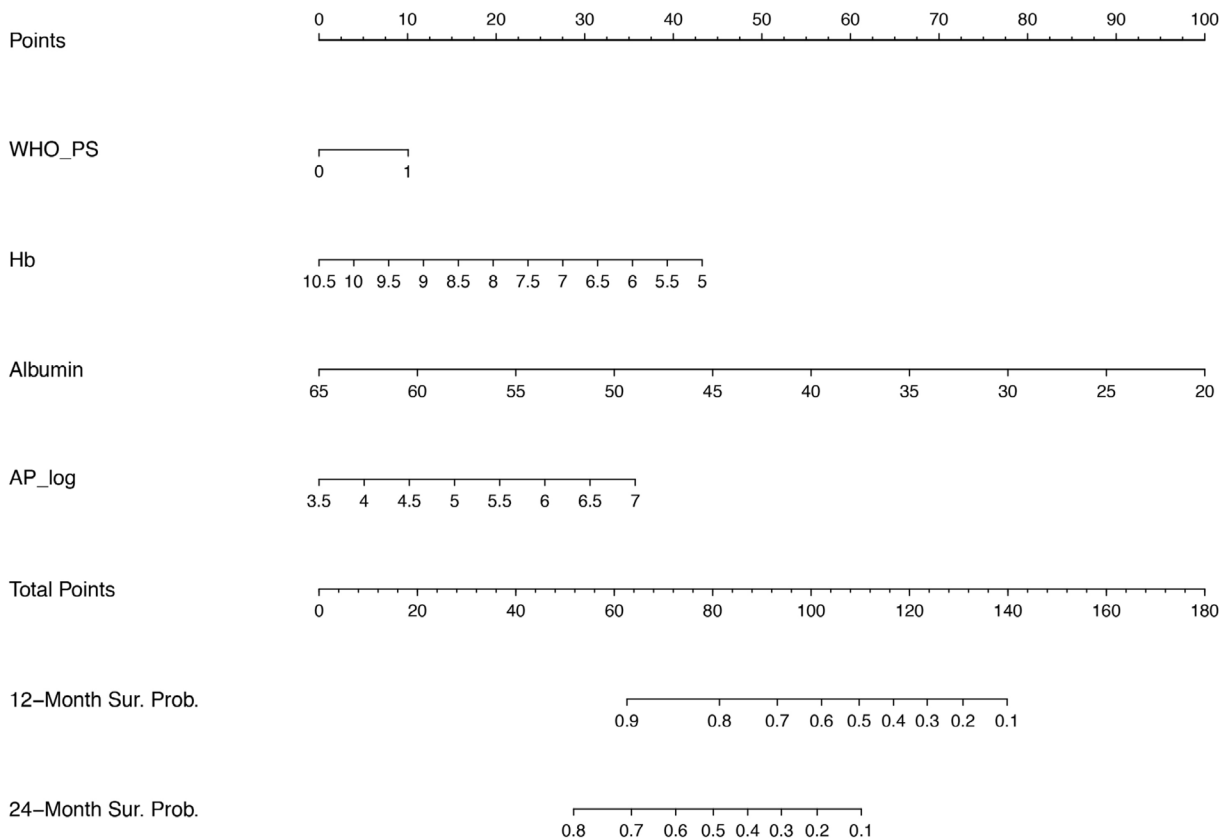

**Figure 1: Nomogram for OS.** Prognostic nomogram predicting overall survival probability. For each variable, starting with WHO performance score on the second axis, draw a vertical line up to the ‘Points’ axis (top line) to identify the number of prognostic points the patient receives for the value of this variable. Calculate the ‘Total Points’ by adding up the prognostic points for each variable. Determine the 12 month or 24 month overall survival by drawing a vertical line from the ‘Total Points’ axis down to the axis indicating the survival probability. WHO PS = world health organization performance status, Hb = hemoglobin, AP = alkaline phosphatase, log = log transformed variables when data were not normally distributed.

**Table 3: Univariable and multivariable model for PSA response**

| Variable        | Univariable OR (95% CI) | P-value | Multivariable OR (95% CI) | P-value |
|-----------------|-------------------------|---------|---------------------------|---------|
| WHO PS (1 vs 0) | 0.48 (0.27–0.84)        | 0.011   |                           |         |
| Hb (mmol/L)     | 1.67 (1.22–2.29)        | 0.002   | 1.48 (1.05–2.07)          | 0.024   |
| AP (log, U/L)   | 0.50 (0.33–0.77)        | 0.002   | 0.61 (0.39–0.96)          | 0.034   |
| LDH (log, U/L)  | 0.49 (0.27–0.88)        | 0.016   |                           |         |

Univariable *N* = 217–224 (because of missing values the number of included patients can differ per variable)

Multivariable *N* = 215.

Abbreviations: WHO PS = world health organization performance status, Hb = hemoglobin, AP = alkaline phosphatase, LDH = lactate dehydrogenase, log = log transformed variables when data were not normally distributed.

disease progression during or after docetaxel therapy, defined as two consecutive rises in PSA (taken  $\geq 1$  week apart) or according to RECIST criteria. Full inclusion criteria are shown in Supplementary materials. In this study, no significant impact of budesonide on the pharmacokinetics of cabazitaxel and cabazitaxel-induced diarrhea was found. We have previously shown that there was no influence of prior treatment with abiraterone acetate or enzalutamide on OS and PSA response of men treated with cabazitaxel [13]. Patients who were deemed

inevaluable in the original CABARESC trial (*N* = 19) (Supplementary Table 1) and patients with missing or inadequate PSA values were considered ineligible for the current analysis (*N* = 3), leaving 224 patients evaluable for the current analysis.

**Biomarker panel**

From all evaluable patients, laboratory and clinical factors collected at baseline and during treatment were

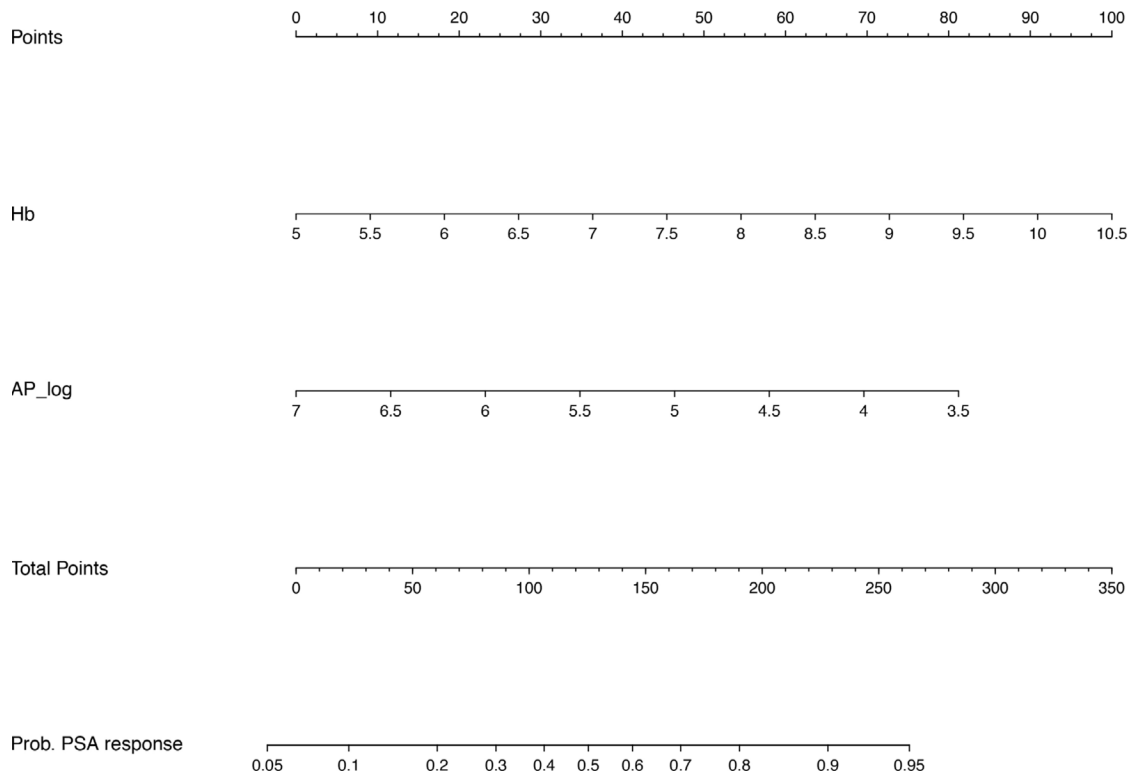

**Figure 2: Nomogram for PSA response.** Prognostic nomogram predicting PSA response. For both variables, Hb and AP\_log, draw a vertical line from the absolute value of this variable up to the ‘Points’ axis (top line) to identify the number of prognostic points the patient receives for these variables. Calculate the ‘Total Points’ by adding up the prognostic points for both variables. Determine the probability of PSA response by drawing a vertical line from the ‘Total Points’ axis down to the axis of the probability of PSA response. Hb = hemoglobin, AP = alkaline phosphatase, log = log transformed variables when data were not normally distributed.



available. The biochemical parameters were collected at baseline included: PSA, lactate dehydrogenase (LDH), AP, albumin (Alb), Hb, derived neutrophil-lymphocyte ratio (dNLR), WHO performance status (0 vs 1), age, type of castration (GnRH analogues vs. surgical castration) and time since last chemotherapy cycle (>6 months vs ≤6 months). The dNLR was computed by the absolute neutrophil count (ANC) divided by the absolute white blood cell count (WBC) minus the ANC, (ANC/ (WBC-ANC)). The occurrence of ≥grade 3 neutropenia during treatment was collected. Log transformation was applied to variables with a non-normal distribution.

### Primary objective and definitions

The objective of the current analysis was to identify prognostic factors associated with OS and PSA response in mCRPC patients treated with cabazitaxel. OS was defined by time from randomization to death from any cause. Patients still alive at the end of the study were censored. Prostate Cancer Working Group 2 (PCWG2) criteria were used to define PSA response as a ≥50% decline from baseline measured twice 3 to 4 weeks apart [14].

### Statistical analysis

Descriptive statistics were used to summarize patients' characteristics. Univariable and multivariable Cox regression analyses were used to investigate the influence of laboratory and clinical parameters on OS. Univariable and multivariable logistic regression analysis were used with PSA response (≥50%) as the dependent variable and baseline parameters were included as covariates. Factors with a  $p < 0.10$  in univariable analysis were entered into the multivariable analysis. The multivariable model was constructed using backward selection at the 5% level. Data were analyzed using STATA® version 14 (Stata-Corp LP TX, USA).

Based on the multivariable model for OS and PSA response we have generated a nomogram for OS and PSA response. Software program 'R' was used to generate both nomograms.

### Abbreviations

ANC, absolute neutrophil count; AP, alkaline phosphatase; Alb, albumin; CI, confidence interval; dNLR, derived neutrophil-lymphocyte ratio; GnRH, Gonadotropin releasing hormone; Hb, hemoglobin; HR, hazard ratio; IQR, inter quartile range; LDH, lactate dehydrogenase; mCRPC, metastatic castration resistant prostate cancer; OR, odds ratio; OS, Overall survival; PCWG2, prostate cancer working group 2; PSA, prostate specific antigen; RECIST, response evaluation criteria in solid tumor; WBC, white blood cell count; WHO PS, world health organization performance status.

### Author contributions

Wrote manuscript: B.P.S. Belderbos, R. de Wit, S. Bins, R.H.J. Mathijssen, R.J. van Soest  
Designed research: A. Nieuweboer, R.J. van Soest  
Performed research: B.P.S. Belderbos, E. Oomen-de Hoop, A. Nieuweboer, R.J. van Soest  
Patient inclusion: P. Hamberg, R.J. van Alphen, A. Bergman, R. de Wit, R.H.J. Mathijssen  
Data collection: A. Nieuweboer, N. van der Meer  
Analyzed data: B.P.S. Belderbos, E. Oomen-de Hoop, R.J. van Soest

### ACKNOWLEDGMENTS

We thank the patients who participated in the CABARESC trial and the investigators who recruited them.

### CONFLICTS OF INTEREST

R.H.J. Mathijssen has received research funding from Sanofi  
R. de Wit has received advisory and speakers fees from Sanofi.  
A. Bergman has received a study grant and speakers fee from Sanofi Genzyme.  
R.J. van Soest has received honoraria from Sanofi and Janssen  
B.P.S. Belderbos, E. Oomen-De Hoop, A. Nieuweboer, P. Hamberg, N. van der Meer and S.Bins have no conflict of interests.

### FUNDING

No funding was received for the analysis in this paper.

### REFERENCES

1. Halabi S, Small EJ, Kantoff PW, Kattan MW, Kaplan EB, Dawson NA, Levine EG, Blumenstein BA, Vogelzang NJ. Prognostic model for predicting survival in men with hormone-refractory metastatic prostate cancer. *J Clin Oncol.* 2003; 21:1232–1237.
2. Smaletz O, Scher HI, Small EJ, Verbel DA, McMillan A, Regan K, Kelly WK, Kattan MW. Nomogram for overall survival of patients with progressive metastatic prostate cancer after castration. *J Clin Oncol.* 2002; 20:3972–3982.
3. Armstrong AJ, Garrett-Mayer ES, Yang YC, de Wit R, Tannock IF, Eisenberger M. A contemporary prognostic nomogram for men with hormone-refractory metastatic prostate cancer: a TAX327 study analysis. *Clin Cancer Res.* 2007; 13:6396–6403.

4. de Bono JS, Oudard S, Ozguroglu M, Hansen S, Machiels JP, Kocak I, Gravis G, Bodrogi I, Mackenzie MJ, Shen L, Roessner M, Gupta S, Sartor AO, et al. Prednisone plus cabazitaxel or mitoxantrone for metastatic castration-resistant prostate cancer progressing after docetaxel treatment: a randomised open-label trial. *Lancet*. 2010; 376:1147–1154.
5. Halabi S, Lin CY, Small EJ, Armstrong AJ, Kaplan EB, Petrylak D, Sternberg CN, Shen L, Oudard S, de Bono J, Sartor O. Prognostic model predicting metastatic castration-resistant prostate cancer survival in men treated with second-line chemotherapy. *J Natl Cancer Inst*. 2013; 105:1729–1737.
6. Nieuweboer AJ, de Graan AM, Hamberg P, Bins S, van Soest RJ, van Alphen RJ, Bergman AM, Beeker A, van Halteren H, Ten Tije AJ, Zuetenhorst H, van der Meer N, Chitu D, et al. Effects of Budesonide on Cabazitaxel Pharmacokinetics and Cabazitaxel-Induced Diarrhea: A Randomized, Open-Label Multicenter Phase II Study. *Clin Cancer Res*. 2017; 23:1679–1683.
7. Lorente D, Mateo J, Templeton AJ, Zafeiriou Z, Bianchini D, Ferraldeschi R, Bahl A, Shen L, Su Z, Sartor O, de Bono JS. Baseline neutrophil-lymphocyte ratio (NLR) is associated with survival and response to treatment with second-line chemotherapy for advanced prostate cancer independent of baseline steroid use. *Ann Oncol*. 2015; 26:750–755.
8. Sonpavde G, Pond GR, Armstrong AJ, Clarke SJ, Vardy JL, Templeton AJ, Wang SL, Paolini J, Chen I, Chow-Maneval E, Lechuga M, Smith MR, Michaelson MD. Prognostic impact of the neutrophil-to-lymphocyte ratio in men with metastatic castration-resistant prostate cancer. *Clin Genitourin Cancer*. 2014; 12:317–324.
9. van Soest RJ, Templeton AJ, Vera-Badillo FE, Mercier F, Sonpavde G, Amir E, Tombal B, Rosenthal M, Eisenberger MA, Tannock IF, de Wit R. Neutrophil-to-lymphocyte ratio as a prognostic biomarker for men with metastatic castration-resistant prostate cancer receiving first-line chemotherapy: data from two randomized phase III trials. *Ann Oncol*. 2015; 26:743–749.
10. Cao J, Zhu X, Zhao X, Li XF, Xu R. Neutrophil-to-Lymphocyte Ratio Predicts PSA Response and Prognosis in Prostate Cancer: A Systematic Review and Meta-Analysis. *PLoS One*. 2016; 11:e0158770.
11. Templeton AJ, McNamara MG, Seruga B, Vera-Badillo FE, Aneja P, Ocana A, Leibowitz-Amit R, Sonpavde G, Knox JJ, Tran B, Tannock IF, Amir E. Prognostic role of neutrophil-to-lymphocyte ratio in solid tumors: a systematic review and meta-analysis. *J Natl Cancer Inst*. 2014; 106:dju124.
12. Meisel A, von Felten S, Vogt DR, Liewen H, de Wit R, de Bono J, Sartor O, Stenner-Liewen F. Severe neutropenia during cabazitaxel treatment is associated with survival benefit in men with metastatic castration-resistant prostate cancer (mCRPC): A post-hoc analysis of the TROPIC phase III trial. *Eur J Cancer*. 2016; 56:93–100.
13. van Soest RJ, Nieuweboer AJ, de Morree ES, Chitu D, Bergman AM, Goey SH, Bos MM, van der Meer N, Hamberg P, de Wit R, Mathijssen RH, Dutch Uro-Oncology Studygroup (DUOS). The influence of prior novel androgen receptor targeted therapy on the efficacy of cabazitaxel in men with metastatic castration-resistant prostate cancer. *Eur J Cancer*. 2015; 51:2562–2569.
14. Scher HI, Halabi S, Tannock I, Morris M, Sternberg CN, Carducci MA, Eisenberger MA, Higano C, Bublely GJ, Dreicer R, Petrylak D, Kantoff P, Basch E, et al. Design and end points of clinical trials for patients with progressive prostate cancer and castrate levels of testosterone: recommendations of the Prostate Cancer Clinical Trials Working Group. *J Clin Oncol*. 2008; 26:1148–1159.
