# Supplementary material for: Prognostic factors in men with metastatic castration-resistant prostate cancer treated with cabazitaxel
Source: PubMed Central journal article supplement (PMC5739748; doi:10.18632/oncotarget.22474), 2017-11-16
Supplement: oncotarget-08-106468-s001.pdf [file oncotarget-08-106468-s001.pdf]

## Prognostic factors in men with metastatic castration-resistant prostate cancer treated with cabazitaxel

### SUPPLEMENTARY MATERIALS

Inclusion and exclusion criteria CABARESC study:

#### Inclusion criteria

- Metastatic castrate resistant prostate cancer (mCRPC) patients with documented disease progression, defined as: documented rising PSA levels (at least 2 consecutive rises in PSA over a reference value taken at least 1 week apart, or a PSA rise of  $\geq 2.0$   $\mu\text{g/l}$ ), appearance of new lesions or documented disease progression based on CT scan or bone scan.
- Previous treatment with a docetaxel-containing regimen
- Age  $\geq 18$  years;
- WHO performance status  $\leq 1$
- Adequate renal function (within 21 days before randomization) defined as serum creatinin  $\leq 1.5 \times \text{ULN}$  and/or calculated creatinin clearance  $\geq 50$  ml/min, according to MDRD formula.
- Adequate hepatic functions (within 21 days before randomization) defined as: total bilirubin  $\leq 1.0 \times \text{ULN}$ ; alanine aminotransferase (ALT) and aspartate aminotransferase (AST)  $\leq 2.5 \times \text{ULN}$ , in case of liver metastasis  $< 5 \times \text{ULN}$ ; alkaline phosphatase (AP)  $< 5 \times \text{ULN}$  In case of bone metastasis, AP  $< 10 \times \text{ULN}$  is accepted.

- Adequate hematological blood counts (within 21 days before randomization) defined as (absolute neutrophil count (ANC)  $\geq 1.5 \times 10^9/\text{L}$  and platelets  $\geq 100 \times 10^9/\text{L}$ );
- Castration, either surgically or by continued LHRH agonist therapy
- Written informed consent according to ICH-GCP

#### Exclusion criteria

- Impossibility or unwillingness to take oral drugs;
- Serious illness or medical unstable condition requiring treatment, brain metastases or history of psychiatric disorder that would prohibit the understanding and giving of informed consent.
- Use of medications or dietary supplements known to induce or inhibit CYP3A
- Known hypersensitivity to corticosteroids
- Any active systemic or local bacterial, viral, fungal–or yeast infection.
- Ulcerative colitis, Crohn’s disease or celiac disease (active or in medical history)
- Ostomy
- Planned/active simultaneous yellow fever vaccine
- Geographical, psychological or other non-medical conditions interfering with follow-up

**Supplementary Table 1: Reasons for exclusion**

| <b>Reasons for exclusion</b>                          | <b>Group CABA</b> | <b>Group BUD</b> | <b>Post-hoc</b> | <b>Total</b> |
|-------------------------------------------------------|-------------------|------------------|-----------------|--------------|
| No cabazitaxel (in study context)*                    | 3                 | 7                | 0               | 10           |
| Initial cabazitaxel dose <25mg/m <sup>2</sup>         | 5                 | 1                | 0               | 6            |
| Treatment started before randomization                | 1                 | 0                | 0               | 1            |
| Death before start therapy                            | 1                 | 0                | 0               | 1            |
| Long treatment delay after randomization <sup>^</sup> | 1                 | 0                | 0               | 1            |
| Missing laboratory values                             | 0                 | 0                | 3               | 3            |
| <b>Total</b>                                          | 11                | 8                | 3               | 22           |

\*due to disease progression and worsening of patient conditions: patient did not receive treatment or not in context of this study. ^due to ASAT and ALAT >2 upper limit of normal without liver metastases there was a time of two months between randomization and start of cabazitaxel therapy.
